# Supplementary material for: Melatonin and Its Metabolites Can Serve as Agonists on the Aryl Hydrocarbon Receptor and Peroxisome Proliferator-Activated Receptor Gamma
Source: MDPI journal article supplement (doi:10.3390/ijms242015496), 2023-10-23
Supplement: s1 [file s1]

## Melatonin and its metabolites can serve as agonists on the AhR and PPAR $\gamma$

Andrzej T. Slominski<sup>1\*#</sup>, Tae-Kang Kim<sup>1\*</sup>, Radomir M. Slominski<sup>1,2\*</sup>, Yuwei Song<sup>1,2\*</sup>, Shariq Qayyum<sup>1,3</sup>, Wojciech Placha<sup>4</sup>, Zorica Janjetovic<sup>1</sup>, Konrad Kleszczynski<sup>5</sup>, Venkatram Atigadda<sup>1</sup>, Yuhua Song<sup>6</sup>, Chander Raman<sup>1</sup>, Cornelis J. Elferink<sup>7</sup>, Judith Varady Hobrath<sup>8</sup>, Anton M. Jetten<sup>9</sup>, Russel Reiter<sup>10</sup>

<sup>1</sup>Department of Dermatology, <sup>2</sup>Department of Genetics, <sup>6</sup>Department of Biomedical Engineering, UAB, Birmingham, AL, USA

<sup>3</sup>Brigham's Women Hospital and Harvard University, Boston, MA, USA

<sup>4</sup>Department of Medicinal Biochemistry, Collegium Medicum, Jagiellonian University, Krakow, Poland

<sup>5</sup>Department of Dermatology, University of Munster, Munster, Germany

<sup>7</sup>Department of Pharmacology and Toxicology, University of Texas Medical Branch, Galveston, TX, USA

<sup>8</sup>Sygnature Discovery, Biocity, Nottingham NG1 1GF, United Kingdom

<sup>9</sup>Cell Biology Section, NIEHS, National Institutes of Health, Research Triangle Park, NC, USA

<sup>10</sup>Department of Cell Systems and Anatomy, UT Health, Long School of Medicine, San Antonio, TX 78229, USA.

**Table S1.** Glide XP docking scores of compounds docked into the AhR homology model

| Compounds Identification                  | Docking Score |
|-------------------------------------------|---------------|
| <b>Control</b>                            |               |
| Indirubin                                 | -9.56         |
| Indole acetic acid                        | -9.03         |
| <b>melatonin and selected metabolites</b> |               |
| N-acetyl serotonin                        | -9.37         |
| N-acetyl-5-methoxykynuramine              | -9.33         |
| Indole 3-carbinol                         | -9.22         |
| Serotonin                                 | -8.94         |
| Melatonin                                 | -8.76         |
| 2-Hydroxy-melatonin                       | -8.70         |
| N-Acetyl-N-formyl-5-methoxykynuramine     | -8.65         |
| 6-Hydroxy-melatonin                       | -8.59         |
| CysteinyldOPA                             | -8.58         |
| 5-Methoxyindole acetic acid               | -8.43         |
| 5-Methoxytryptamine                       | -8.36         |
| 4-Hydroxy-melatonin                       | -8.19         |
| Dihydroxyindole carboxylic acid           | -8.17         |
| 5-Methoxytryptophol                       | -8.05         |
| Dihydroxyindole                           | -8.00         |
| L-Tryptophan                              | -7.92         |
| L-DOPA                                    | -7.48         |
| GlutathionylDOPA                          | -6.99         |
| 2-CysteinyldOPA                           | -6.65         |

**Table S2.** Glide XP docking scores of compounds docked into the PPAR $\gamma$  homology mode

| Compounds Identification                  | Docking Score |
|-------------------------------------------|---------------|
| <b>Control</b>                            |               |
| rosiglitazone                             | -8.20         |
| <b>melatonin and selected metabolites</b> |               |
| 2-GlutathionylDOPA                        | -10.19        |
| 2-Hydroxy-melatonin                       | -9.54         |
| Indole acetic acid                        | -9.03         |
| N-Acetyl-N-formyl-5-methoxykynuramine     | -8.98         |
| Indirubine                                | -8.92         |

|                                 |       |
|---------------------------------|-------|
| GlutathionylDOPA                | -8.85 |
| CysteinyIDOPA                   | -8.80 |
| 5-Methoxyindole acetic acid     | -8.74 |
| 5-Methoxytryptophol             | -8.73 |
| 4-Hydroxy-melatonin             | -8.69 |
| 6-Hydroxy-melatonin             | -8.54 |
| Dihydroxyindole carboxylic acid | -8.40 |
| Dihydroxyindole                 | -8.37 |
| 2-CysteinyIDOPA                 | -8.20 |
| N-acetyl-5-methoxykynuramine    | -7.83 |
| Melatonin                       | -7.77 |
| Serotonin                       | -7.74 |
| Indole 3-carbinol               | -7.51 |
| 5-Methoxytryptamine             | -7.38 |
| L-Tryptophan                    | -7.07 |
| L-DOPA                          | -6.73 |

**Table S3.** Summary of AhR residues forming the binding site region of Melatonin, 6(OH)Melatonin, 5-MTT, AFMK in docked complexes.

| Compounds      | Polar or charged residues                | Non-polar residues                                   |
|----------------|------------------------------------------|------------------------------------------------------|
| Melatonin      | Y322, C333, S336, H337, S365, Q383       | F295, G321, I325, M340, M348, F351, L353, A367, V381 |
| 6(OH)Melatonin | H291, S320, Y322, C333, H337, Q383       | L315, G321, F324, I325, A334, L353                   |
| 5-MTT          | H291, Y322, C333, S336, H337, S346, S365 | F295, M340, G347, M348, F351, A367, I379, V381       |
| AFMK           | S320, Y322, C333, S336, H337, S365, Q383 | F295, G321, F324, G347, M348, F351, L353, A367, V381 |

**Table S4.** Summary of PPAR $\gamma$  residues forming the binding site region of Melatonin, 6(OH)Melatonin, 5-MTT, AFMK in docked complexes.

| Compounds      | Polar or charged residues                      | Non-polar residues                                                                 |
|----------------|------------------------------------------------|------------------------------------------------------------------------------------|
| Melatonin      | R288, E295, S342, E343                         | F226, P227, L228, A292, I296, I325, I326, M329, L330, L333, V339, L340, I341, G346 |
| 6(OH)Melatonin | C285, R288, S289, H323, Y327, K367, H449       | A292, I326, I326, M329, L330, L333, F363, M364                                     |
| 5-MTT          | T229, K230, C285, R288, S289, E295, S332       | F226, L228, A233, A292, I326, M329, L330, L333                                     |
| AFMK           | C285, Q286, R288, S289, H323, Y327, K367, H449 | L228, F282, I326, M329, L330, L333, V339, L340, I341, F363, M364                   |

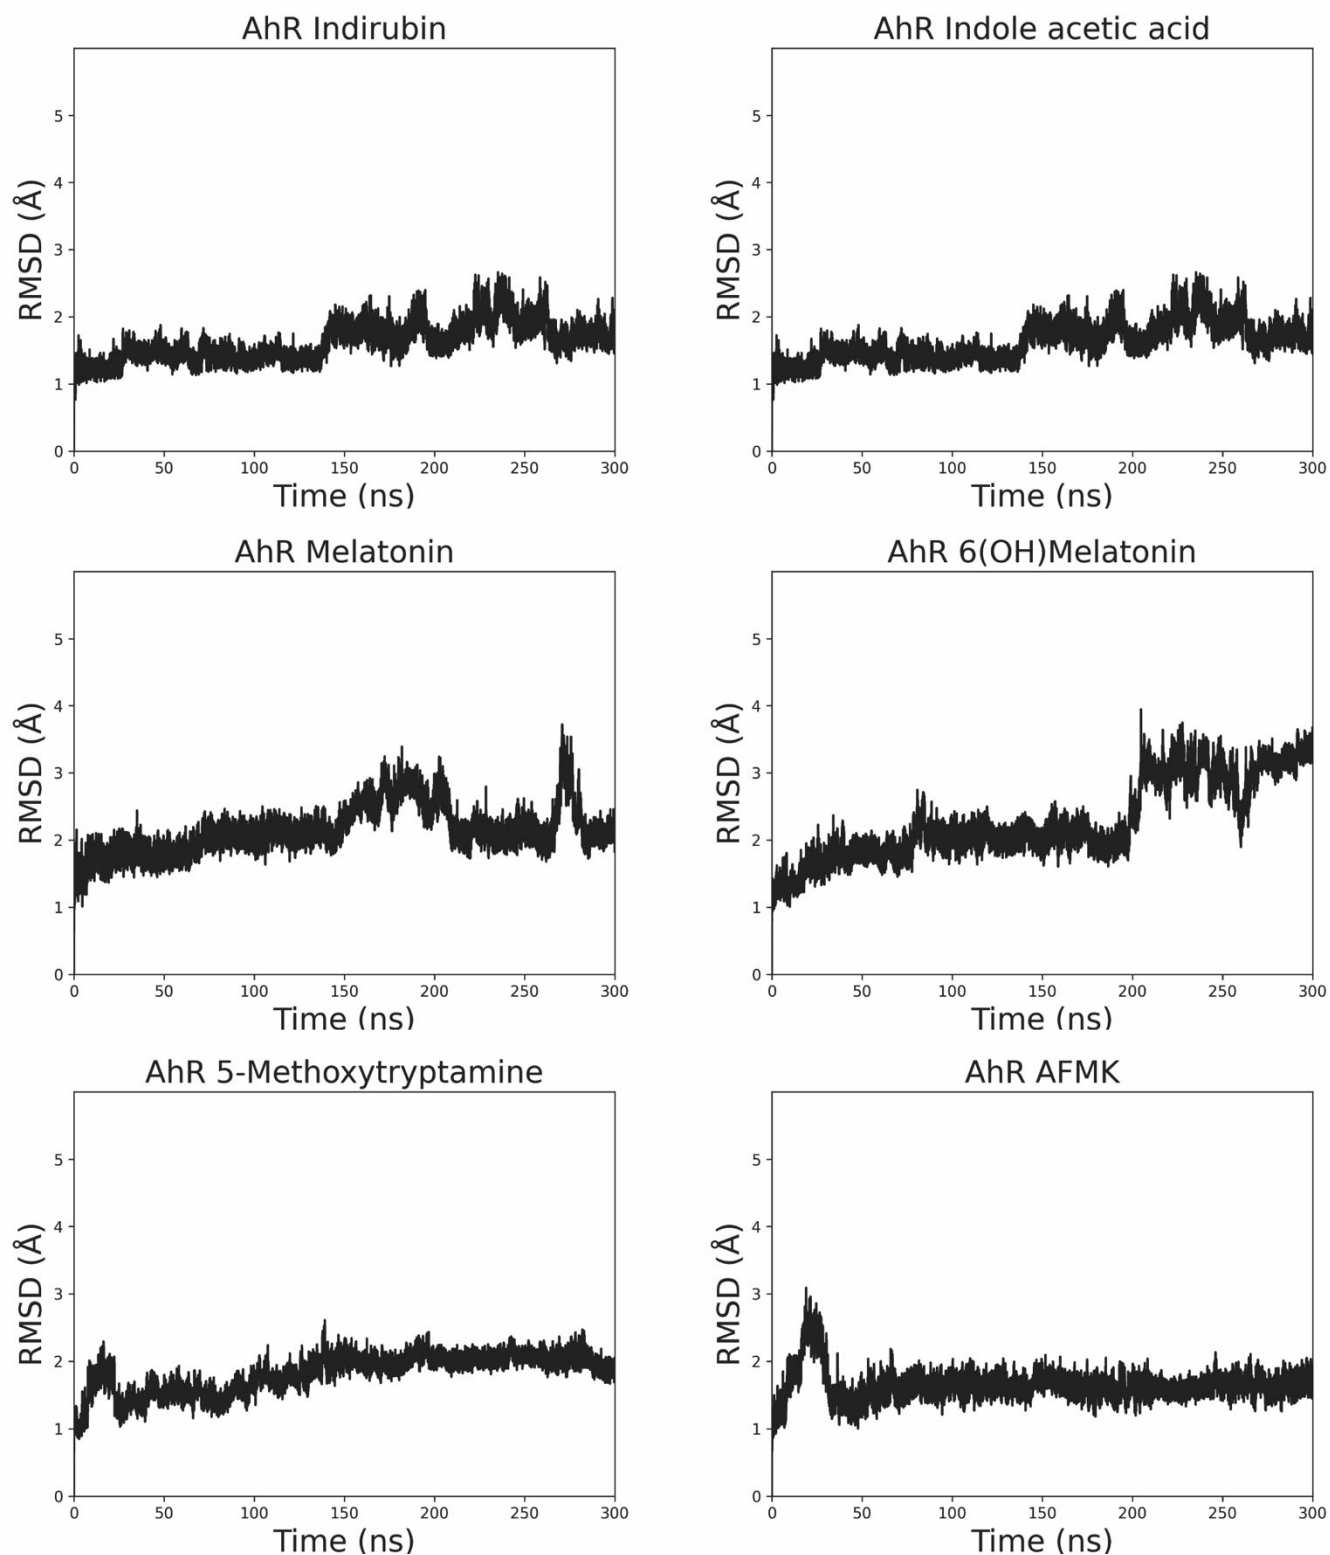

**Figure S1.** Root mean square deviation (RMSD) showing equilibration of the six MD simulation systems for the natural ligands and melatonin and metabolites with the AhR receptor
